# Supplementary material
Source: PubMed Central journal article supplement (PMC3603388)
Supplement: ismej2012144x3.pdf [file ismej2012144x3.pdf]

|                 |      |
|-----------------|------|
| Blue            | 0.90 |
| Light Blue      | 0.93 |
| Very Light Blue | 0.96 |
| White           | 1    |
| Light Red       | 1.06 |
| Red             | 1.12 |
| Dark Red        | 1.17 |

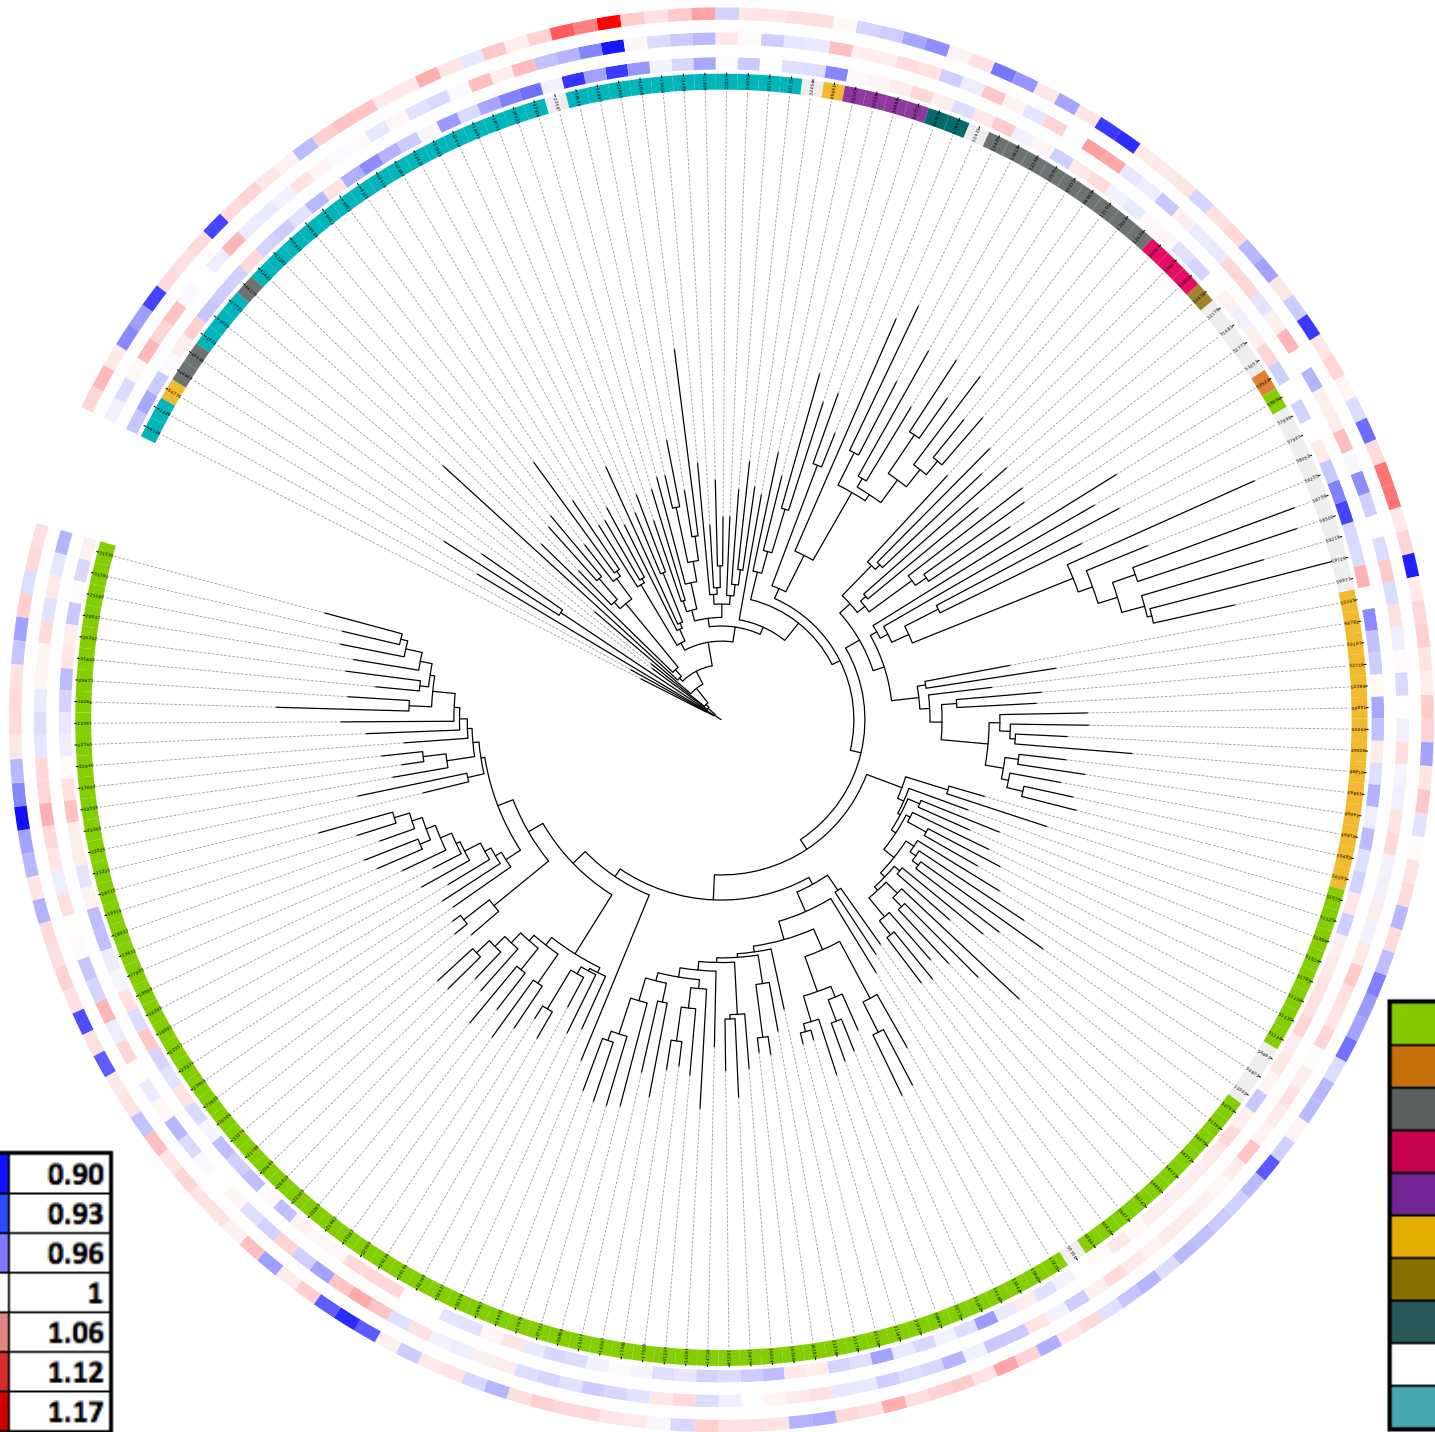

|            |                |
|------------|----------------|
| Green      | Proteobacteria |
| Brown      | Chloroflexi    |
| Grey       | Bacteroidetes  |
| Pink       | Acidobacteria  |
| Purple     | Spirochaetes   |
| Yellow     | Actinobacteria |
| Olive      | Planctomycetes |
| Dark Green | Cyanobacteria  |
| White      | Other Phylum   |
| Teal       | Firmicutes     |
